# Supplementary material for: Screening and diagnosis of cardiovascular disease using artificial intelligence-enabled cardiac magnetic resonance imaging
Source: PubMed Central journal article supplement (PMC11108784; doi:10.1038/s41591-024-02971-2), 2024-05-13

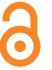

---

# Screening and diagnosis of cardiovascular disease using artificial intelligence-enabled cardiac magnetic resonance imaging

---

In the format provided by the authors and unedited

---

# Supplementary Information

## Table of Contents

|                                                                                                                                                   |    |
|---------------------------------------------------------------------------------------------------------------------------------------------------|----|
| 1. Supplementary Table 1. PPV and NPV of the diagnostic model derived from cine and LGE as combined inputs in the primary dataset (n=6650).....   | 2  |
| 2. Supplementary Table 2. Performance of the screening model in the consecutive testing set (n=961).....                                          | 2  |
| 3. Supplementary Table 3. The 48 patients from the consecutive testing set, excluded from the reported diagnostic model performance metrics. .... | 3  |
| 4. Supplementary Table 4. Performance of the diagnostic model in the consecutive testing set (n=532).....                                         | 7  |
| 5. Supplementary Table 5. Distribution of demographics and LVEF in the primary dataset.....                                                       | 8  |
| 6. Supplementary Table 6. Distribution of demographics and cardiac function in the consecutive testing set.....                                   | 8  |
| 7. Supplementary Table 7. The typical CMR scan protocol and scanner parameters for the primary and external sets. ....                            | 9  |
| 8. Supplementary Figure 1. The distribution of LVEF across the 11 CVD classes and the normal control class in the primary dataset.....            | 10 |
| 9. Supplementary Figure 2. The clinical prevalence of CVD classes .....                                                                           | 11 |
| 10. Supplementary Figure 3. The impact of learning rate modification on the VST backbone .....                                                    | 11 |

**1. Supplementary Table 1. PPV and NPV of the diagnostic model derived from cine and LGE as combined inputs in the primary dataset (n=6650).**

| <b>Supplementary Table 1   PPV and NPV of the diagnostic model derived from cine and LGE as combined inputs in the primary dataset (n=6650).</b> |                   |                     |                     |                     |                     |
|--------------------------------------------------------------------------------------------------------------------------------------------------|-------------------|---------------------|---------------------|---------------------|---------------------|
|                                                                                                                                                  |                   | PPV                 |                     | NPV                 |                     |
|                                                                                                                                                  |                   | Internal            | External            | Internal            | External            |
| 1                                                                                                                                                | HCM               | 0.956 (0.947-0.963) | 0.932 (0.907-0.955) | 0.997 (0.996-0.999) | 0.983 (0.975-0.991) |
| 2                                                                                                                                                | DCM               | 0.875 (0.858-0.892) | 0.754 (0.702-0.803) | 0.977 (0.973-0.981) | 0.998 (0.996-1.000) |
| 3                                                                                                                                                | CAD               | 0.940 (0.924-0.954) | 0.952 (0.928-0.977) | 0.984 (0.981-0.987) | 0.966 (0.954-0.976) |
| 4                                                                                                                                                | LVNC              | 0.805 (0.757-0.848) | 1.000 (1.000-1.000) | 0.989 (0.986-0.991) | 0.994 (0.989-0.998) |
| 5                                                                                                                                                | RCM               | 0.877 (0.843-0.912) | 0.600 (0.433-0.767) | 0.993 (0.990-0.995) | 0.999 (0.998-1.000) |
| 6                                                                                                                                                | CAM               | 0.951 (0.921-0.979) | 0.983 (0.955-1.000) | 0.996 (0.995-0.998) | 0.985 (0.978-0.991) |
| 7                                                                                                                                                | HHD               | 0.746 (0.704-0.789) | 0.735 (0.644-0.823) | 0.981 (0.977-0.984) | 0.976 (0.967-0.983) |
| 8                                                                                                                                                | Myocarditis       | 0.776 (0.676-0.862) | 0.810 (0.686-0.921) | 0.996 (0.994-0.997) | 0.977 (0.969-0.984) |
| 9                                                                                                                                                | ARVC              | 0.864 (0.825-0.899) | 0.904 (0.816-0.977) | 0.987 (0.984-0.989) | 0.995 (0.991-0.999) |
| 10                                                                                                                                               | PAH               | 0.992 (0.974-1.000) | 1.000 (1.000-1.000) | 0.999 (0.998-0.999) | 0.997 (0.994-0.999) |
| 11                                                                                                                                               | Ebstein's Anomaly | 0.937 (0.875-0.986) | 0.977 (0.918-1.000) | 0.998 (0.997-0.999) | 1.000 (1.000-1.000) |

\*95% confidence interval in the brackets. PPV: positive predictive value; NPV: negative predictive value.

**2. Supplementary Table 2. Performance of the screening model in the consecutive testing set (n=961).**

| <b>Supplementary Table 2   Performance of the screening model in the consecutive testing set (n=961).</b> |                                         |
|-----------------------------------------------------------------------------------------------------------|-----------------------------------------|
| <b>Performance</b>                                                                                        | <b>Screening Model (SAX + 4CH cine)</b> |
| AUROC                                                                                                     | 0.984 (0.977-0.990)                     |
| PPV                                                                                                       | 0.971 (0.957-0.982)                     |
| Specificity with sensitivity at 90%                                                                       | 0.994 (0.965-1.000)                     |
| Sensitivity with specificity at 90%                                                                       | 0.946 (0.930-0.964)                     |
| F1-score                                                                                                  | 0.962 (0.953-0.972)                     |

AUROC=area under the receiver operating characteristic curve; PPV=positive predictive value (precision); CI=confidence intervals; SAX=short axis; 4CH=four chamber.

### 3. Supplementary Table 3. The 48 patients from the consecutive testing set, excluded from the reported diagnostic model performance metrics.

Note: it's noteworthy that the AI screening model demonstrated robust performance by correctly classifying all 48 patients into the abnormal class, with a high average confidence score of 0.918. This successful classification, along with the high confidence score, highlights the screening model's robustness in handling a diverse range of cardiovascular diseases, including suspected phenocopies, such as genetic metabolic cardiomyopathy, which extend beyond the commonly recognized 11 CVD classes.

In contrast, the diagnostic model classified these cases with an average extremely low confidence score of 0.585, emphasizing the model's cautious approach when dealing with instances that deviate from the specified 11 CVD classes. Future direction includes the introduction of an additional AI deferral system that could defer cases with low confidence scores, falling below a predefined threshold, for expert human assessment. This collaborative synergy between human clinicians and AI models holds promise for further improving diagnostic accuracy, especially in scenarios beyond the commonly specified 11 CVD classes.

| <b>Supplementary Table 3   The 48 patients from the consecutive testing set, excluded from the reported diagnostic model performance metrics.</b> |                            |                                      |                                      |                                       |                                       |                                                                                                                                                                                                           |
|---------------------------------------------------------------------------------------------------------------------------------------------------|----------------------------|--------------------------------------|--------------------------------------|---------------------------------------|---------------------------------------|-----------------------------------------------------------------------------------------------------------------------------------------------------------------------------------------------------------|
| <b>Patient ID</b>                                                                                                                                 | <b>Summary</b>             | <b>AI Screening Model Prediction</b> | <b>AI Screening Confidence Score</b> | <b>AI Diagnostic Model Prediction</b> | <b>AI Diagnostic Confidence Score</b> | <b>Diagnosis by Human Experts</b>                                                                                                                                                                         |
| Average Confidence Score                                                                                                                          |                            |                                      | 0.918                                |                                       |                                       | 0.585                                                                                                                                                                                                     |
| 1                                                                                                                                                 | Post-operative imaging     | Abnormal                             | 0.771                                | RCM                                   | 0.469                                 | Following cardiac transplant surgery, there is observed enlargement of the left atrium.                                                                                                                   |
| 2                                                                                                                                                 | Post-operative imaging     | Abnormal                             | 1.000                                | HHD                                   | 0.648                                 | Following surgical intervention for Hypertrophic Cardiomyopathy (HCM) utilizing the Morrow procedure.                                                                                                     |
| 3                                                                                                                                                 | Post-operative imaging     | Abnormal                             | 1.000                                | DCM                                   | 0.649                                 | Patient with a history of congenital heart disease undergoing postoperative repair of a ventricular septal defect.                                                                                        |
| 4                                                                                                                                                 | Post-operative imaging     | Abnormal                             | 0.999                                | ARVC                                  | 0.521                                 | Following surgical intervention for Tetralogy of Fallot, there is observed right heart enlargement.                                                                                                       |
| 5                                                                                                                                                 | Post-operative imaging     | Abnormal                             | 1.000                                | PAH                                   | 0.773                                 | Following surgical correction of atrial septal defect and pulmonary valve stenosis, there is secondary right ventricular enlargement.                                                                     |
| 6                                                                                                                                                 | Post-operative imaging     | Abnormal                             | 1.000                                | PAH                                   | 0.680                                 | After balloon pulmonary valvuloplasty and modified Blalock-Taussig shunt procedures, there is secondary enlargement of the right atrium and ventricle.                                                    |
| 7                                                                                                                                                 | Post-operative imaging     | Abnormal                             | 1.000                                | ARVC                                  | 0.513                                 | Following corrective surgery for Tetralogy of Fallot, there is observed enlargement of the right ventricle.                                                                                               |
| 8                                                                                                                                                 | Inadequate imaging quality | Abnormal                             | 0.519                                | CAD                                   | 0.378                                 | Suspected subendocardial enhancement in the left ventricular lateral wall. Unclear diagnosis                                                                                                              |
| 9                                                                                                                                                 | Inadequate imaging quality | Abnormal                             | 1.000                                | RCM                                   | 0.425                                 | Enlargement of the entire heart, reduced cardiac function, considering a correlation with atrial fibrillation.                                                                                            |
| 10                                                                                                                                                | Inadequate imaging quality | Abnormal                             | 1.000                                | CAD                                   | 0.713                                 | Left ventricular enlargement with impaired systolic function, demonstrating subendocardial enhancement and interventricular septal wall enhancement; a substantial likelihood of concurrent hypertension. |
| 11                                                                                                                                                | Borderline/mild cases      | Abnormal                             | 0.667                                | Myocarditis                           | 0.610                                 | Mild left ventricular enlargement is observed without evidence of fibrosis.                                                                                                                               |

|    |                                      |          |       |             |       |                                                                                                                                                                                                                                                                                   |
|----|--------------------------------------|----------|-------|-------------|-------|-----------------------------------------------------------------------------------------------------------------------------------------------------------------------------------------------------------------------------------------------------------------------------------|
| 12 | Borderline/mild cases                | Abnormal | 1.000 | HHD         | 0.370 | There is mild enlargement observed in both ventricles, accompanied by a slight thickening of the mid-segment of the interventricular septum (maximum thickness approximately 13mm).                                                                                               |
| 13 | Borderline/mild cases                | Abnormal | 1.000 | HCM         | 0.667 | Left ventricular enlargement with preserved systolic function is noted, and an association with sinus bradycardia is being considered.                                                                                                                                            |
| 14 | Borderline/mild cases                | Abnormal | 0.824 | Myocarditis | 0.389 | Mild left atrial and ventricular enlargement observed, with no evidence of fibrosis; consideration of a correlation with arrhythmia.                                                                                                                                              |
| 15 | Borderline/mild cases                | Abnormal | 0.906 | RCM         | 0.400 | Enlargement of the left atrium is observed, along with a subtle presence of fatty signals in the left ventricular myocardium, suggestive of a mild pathological condition.                                                                                                        |
| 16 | Borderline/mild cases                | Abnormal | 1.000 | Myocarditis | 0.704 | Borderline/mild case                                                                                                                                                                                                                                                              |
| 17 | Borderline/mild cases                | Abnormal | 0.972 | RCM         | 0.718 | Bilateral atrial enlargement observed, with no other discernible abnormalities.                                                                                                                                                                                                   |
| 18 | Borderline/mild cases                | Abnormal | 0.620 | Myocarditis | 0.455 | Left ventricular enlargement with normal systolic function.                                                                                                                                                                                                                       |
| 19 | Borderline/mild cases                | Abnormal | 0.667 | HCM         | 0.289 | There is a mild thickening of the interventricular septum, measuring 12mm.                                                                                                                                                                                                        |
| 20 | Dual condition                       | Abnormal | 1.000 | CAD         | 0.677 | Diagnosis includes both CAD and DCM. CMR reveals patchy myocardial enhancement and fibrosis in subendocardial areas of the basal and mid-anterior segments of the left ventricle. Additionally, an enlarged left ventricular end-diastolic cavity measuring 60mm is observed.     |
| 21 | Unclear diagnosis from human experts | Abnormal | 1.000 | CAD         | 0.673 | Unclear Diagnosis from human experts                                                                                                                                                                                                                                              |
| 22 | Unclear diagnosis from human experts | Abnormal | 1.000 | HHD         | 0.757 | Interventricular septal thickening, left ventricular enlargement with reduced systolic function, and multifocal fibrosis in the septum and left ventricular lateral wall are noted. Genetic metabolic cardiomyopathy is under consideration, necessitating further investigation. |
| 23 | Unclear diagnosis from human experts | Abnormal | 1.000 | HHD         | 0.753 | There is left ventricular enlargement accompanied by reduced systolic function, interventricular septal thickening, and widespread myocardial enhancement in the left ventricle. Genetic metabolic cardiomyopathy is under consideration, necessitating further investigation.    |
| 24 | Unclear diagnosis from human experts | Abnormal | 1.000 | DCM         | 0.619 | There is left ventricular enlargement with systolic function at the lower limit of normal, accompanied by a minor degree of fibrosis. Unclear diagnosis from human experts                                                                                                        |
| 25 | Unclear diagnosis from human experts | Abnormal | 1.000 | DCM         | 0.713 | Left ventricular enlargement is accompanied by a decrease in systolic function and the presence of multiple                                                                                                                                                                       |

|    |                                      |          |       |             |       |                                                                                                                                                                                                                                                    |
|----|--------------------------------------|----------|-------|-------------|-------|----------------------------------------------------------------------------------------------------------------------------------------------------------------------------------------------------------------------------------------------------|
|    |                                      |          |       |             |       | areas of myocardial fibrosis. Unclear diagnosis from human experts                                                                                                                                                                                 |
| 26 | Unclear diagnosis from human experts | Abnormal | 1.000 | CAD         | 0.691 | There is left ventricular enlargement accompanied by a decrease in systolic function, along with extensive subendocardial enhancement. Unclear diagnosis from human experts                                                                        |
| 27 | Unclear diagnosis from human experts | Abnormal | 1.000 | HHD         | 0.754 | Noticeable thickening of both left and right ventricular walls, coupled with widespread abnormal enhancement of the left ventricular myocardium; genetic metabolic cardiomyopathy remains within diagnostic consideration.                         |
| 28 | Unclear diagnosis from human experts | Abnormal | 1.000 | DCM         | 0.741 | Left ventricular enlargement is observed with diminished systolic function and widespread fibrosis within the left ventricular wall. Unclear diagnosis from human experts.                                                                         |
| 29 | Unclear diagnosis from human experts | Abnormal | 0.676 | Myocarditis | 0.424 | Observation of left ventricular enlargement is noted, with preserved systolic function; however, a minor degree of fibrosis in the lateral wall is observed, which does not align with the diagnostic criteria for dilated cardiomyopathy (DCM).   |
| 30 | Beyond the 11 CVD Classes            | Abnormal | 1.000 | RCM         | 0.471 | Mild left atrial enlargement is noted, accompanied by a mildly thickened left ventricular wall with multifocal fibrotic changes. This presentation is indicative of a cardiomyopathy related to a DES gene mutation.                               |
| 31 | Beyond the 11 CVD Classes            | Abnormal | 1.000 | CHD         | 0.424 | Presence of an occupying lesion in the right ventricular cavity, indicative of a tumor-like pathology, representing a rare condition.                                                                                                              |
| 32 | Beyond the 11 CVD Classes            | Abnormal | 1.000 | Myocarditis | 0.393 | Takotsubo syndrome / Stress cardiomyopathy.                                                                                                                                                                                                        |
| 33 | Beyond the 11 CVD Classes            | Abnormal | 1.000 | DCM         | 0.564 | Constrictive pericarditis, with enlargement of both atria.                                                                                                                                                                                         |
| 34 | Beyond the 11 CVD Classes            | Abnormal | 0.668 | HCM         | 0.705 | The mid-segment of the interventricular septum exhibits slight thickening, while maintaining normal left ventricular systolic function. Additionally, there is a suspicion of minor subendocardial fibrosis in the left ventricular inferior wall. |
| 35 | Beyond the 11 CVD Classes            | Abnormal | 0.998 | DCM         | 0.774 | Mild left ventricular enlargement is observed alongside normal but reduced systolic function, indicating asynchronous left ventricular contraction. The possibility of an association with left bundle branch block (LBBB) is under consideration. |
| 36 | Beyond the 11 CVD Classes            | Abnormal | 1.000 | HHD         | 0.646 | Aortic valve stenosis accompanied by regurgitation, leading to secondary left ventricular enlargement and interventricular septal thickening.                                                                                                      |
| 37 | Beyond the 11 CVD Classes            | Abnormal | 1.000 | CAD         | 0.626 | Bicuspid aortic valve malformation leading to secondary left ventricular enlargement, interventricular septal                                                                                                                                      |

|    |                           |          |       |      |       |                                                                                                                                                                     |
|----|---------------------------|----------|-------|------|-------|---------------------------------------------------------------------------------------------------------------------------------------------------------------------|
|    |                           |          |       |      |       | thickening, and subendocardial enhancement.                                                                                                                         |
| 38 | Beyond the 11 CVD Classes | Abnormal | 0.665 | DCM  | 0.466 | Mild left ventricular enlargement is noted, with systolic function at the lower limit of normal; the presentation does not align with dilated cardiomyopathy (DCM). |
| 39 | Beyond the 11 CVD Classes | Abnormal | 0.869 | LVNC | 0.594 | Mitral valve prolapse is noted, along with left ventricular enlargement and excessive trabeculation.                                                                |
| 40 | Beyond the 11 CVD Classes | Abnormal | 0.523 | RCM  | 0.419 | Bilateral atrial enlargement is noted, with consideration given to its association with atrial fibrillation.                                                        |
| 41 | Beyond the 11 CVD Classes | Abnormal | 1.000 | DCM  | 0.556 | Mitral valve prolapse associated with severe regurgitation, concurrent with left ventricular enlargement.                                                           |
| 42 | Beyond the 11 CVD Classes | Abnormal | 1.000 | RCM  | 0.646 | There is marked enlargement of both atria, prompting consideration of an association with atrial fibrillation.                                                      |
| 43 | Beyond the 11 CVD Classes | Abnormal | 1.000 | DCM  | 0.577 | Severe aortic valve regurgitation, resulting in marked secondary enlargement of the left ventricle accompanied by reduced systolic function.                        |
| 44 | Beyond the 11 CVD Classes | Abnormal | 1.000 | DCM  | 0.481 | Significant intrapericardial mass occupying a considerable volume within the pericardial cavity.                                                                    |
| 45 | Beyond the 11 CVD Classes | Abnormal | 1.000 | DCM  | 0.618 | Left ventricular enlargement with preserved function; consideration given to its association with arrhythmia (frequent premature beats).                            |
| 46 | Beyond the 11 CVD Classes | Abnormal | 0.709 | RCM  | 0.728 | Evidence of pericardial thickening is noted, accompanied by bilateral atrial enlargement, raising suspicion for constrictive pericarditis.                          |
| 47 | Beyond the 11 CVD Classes | Abnormal | 1.000 | HHD  | 0.587 | A quadricuspid aortic valve is observed, leading to secondary left ventricular enlargement and hypertrophy.                                                         |
| 48 | Beyond the 11 CVD Classes | Abnormal | 1.000 | DCM  | 0.634 | Severe aortic valve regurgitation has led to secondary left ventricular enlargement; however, systolic function remains within an acceptable range.                 |

**4. Supplementary Table 4. Performance of the diagnostic model in the consecutive testing set (n=532).**

| Supplementary Table 4   Performance of the diagnostic model in the fresh consecutive testing set (n=532). |                   |                 |                               |                     |
|-----------------------------------------------------------------------------------------------------------|-------------------|-----------------|-------------------------------|---------------------|
| CVD class                                                                                                 |                   | No. of Subjects | Diagnostic Model (cine + LGE) |                     |
|                                                                                                           |                   |                 | AUROC (95%CI)                 | F1 score (95%CI)    |
| 1                                                                                                         | HCM               | 239             | 0.993 (0.988-0.997)           | 0.958 (0.940-0.975) |
| 2                                                                                                         | DCM               | 107             | 0.991 (0.983-0.996)           | 0.922 (0.883-0.958) |
| 3                                                                                                         | CAD               | 58              | 0.997 (0.994-0.999)           | 0.915 (0.855-0.966) |
| 4                                                                                                         | LVNC              | 10              | 0.992                         | 0.727               |
| 5                                                                                                         | RCM               | 8               | 0.997                         | 0.762               |
| 6                                                                                                         | CAM               | 10              | 1.000                         | 0.947               |
| 7                                                                                                         | HHD               | 72              | 0.942 (0.904-0.970)           | 0.742 (0.656-1.000) |
| 8                                                                                                         | Myocarditis       | 10              | 0.991                         | 0.706               |
| 9                                                                                                         | ARVC              | 15              | 0.993                         | 0.889               |
| 10                                                                                                        | PAH               | 0               | -                             | -                   |
| 11                                                                                                        | Ebstein's Anomaly | 3               | 1.000                         | 1.000               |
| Class frequency-weighted average                                                                          |                   |                 | 0.986                         | 0.903               |

AUROC=area under the receiver operating characteristic curve; CI=confidence intervals. The calculation of the 95% CI was not performed for sample sizes below 50 due to potential limitations in the precision of estimates associated with small sample sizes.



## 5. Supplementary Table 5. Distribution of demographics and LVEF in the primary dataset.

| Supplementary Table 5   Distribution of demographics and LVEF across 11 CVD classes and the normal control class in the primary dataset. |                 |            |           |                 |             |                   |  |
|------------------------------------------------------------------------------------------------------------------------------------------|-----------------|------------|-----------|-----------------|-------------|-------------------|--|
|                                                                                                                                          | No. of Subjects | Sex        |           | Age (Range)     | LVEF        |                   |  |
|                                                                                                                                          |                 | Male       | Female    |                 | Mean (STD)  | Median (Q1, Q3)   |  |
| Normal Controls                                                                                                                          | 1250            | 700 (56%)  | 550 (44%) | 37 ± 14 (10-78) | 60.1 (5.9)  | 60.0 (56.0, 64.0) |  |
| 1 HCM                                                                                                                                    | 2327            | 1513 (65%) | 814 (35%) | 48 ± 14 (7-86)  | 65.2 (5.8)  | 66.0 (62.0, 69.0) |  |
| 2 DCM                                                                                                                                    | 1435            | 1076 (75%) | 359 (25%) | 44 ± 15 (4-82)  | 25.9 (9.1)  | 25.0 (19.0, 32.0) |  |
| 3 CAD                                                                                                                                    | 942             | 829 (88%)  | 113 (12%) | 56 ± 11 (8-83)  | 34.8 (16.2) | 33.0 (24.0, 43.0) |  |
| 4 LVNC                                                                                                                                   | 291             | 192 (66%)  | 99 (34%)  | 39 ± 16 (6-77)  | 38.1 (14.8) | 36.0 (25.9, 52.0) |  |
| 5 RCM                                                                                                                                    | 355             | 170 (48%)  | 185 (52%) | 50 ± 20 (7-85)  | 53.6 (8.6)  | 53.0 (48.0, 60.0) |  |
| 6 CAM                                                                                                                                    | 220             | 156 (71%)  | 64 (29%)  | 56 ± 11 (18-83) | 45.7 (11.4) | 47.0 (38.1, 54.0) |  |
| 7 HHD                                                                                                                                    | 402             | 366 (91%)  | 36 (9%)   | 42 ± 13 (12-75) | 41.9 (15.2) | 40.9 (30.1, 54.0) |  |
| 8 Myocarditis                                                                                                                            | 87              | 64 (74%)   | 23 (26%)  | 28 ± 11 (14-69) | 55.3 (10.5) | 57.0 (53.5, 61.0) |  |
| 9 ARVC                                                                                                                                   | 370             | 245 (66%)  | 125 (34%) | 39 ± 14 (9-74)  | 45.8 (13.9) | 48.0 (36.0, 56.7) |  |
| 10 PAH                                                                                                                                   | 134             | 36 (27%)   | 98 (73%)  | 32 ± 12 (10-72) | 56.3 (7.2)  | 56.0 (51.9, 60.1) |  |
| 11 Ebstein's Anomaly                                                                                                                     | 87              | 33 (38%)   | 54 (62%)  | 34 ± 16 (2-63)  | 53.1 (9.9)  | 54.0 (47.8, 60.0) |  |

\*Q1: the first quartile; Q3: the third quartile; STD: standard deviation; LVEF: left ventricular ejection fraction.

## 6. Supplementary Table 6. Distribution of demographics and cardiac function in the consecutive testing set.

| Supplementary Table 6   Distribution of demographics and cardiac function across 11 cardiovascular disease classes and the normal control class in the independent consecutive testing set. |        |          |          |                 |            |                   |             |                      |            |                    |              |                      |             |                      |
|---------------------------------------------------------------------------------------------------------------------------------------------------------------------------------------------|--------|----------|----------|-----------------|------------|-------------------|-------------|----------------------|------------|--------------------|--------------|----------------------|-------------|----------------------|
|                                                                                                                                                                                             | Number | Sex      |          | Age (Range)     | LVEF       |                   | LV mass     |                      | LVMi       |                    | EDV          |                      | EDVi        |                      |
|                                                                                                                                                                                             |        | Male     | Female   |                 | Mean (STD) | Median (Q1, Q3)   | Mean (STD)  | Median (Q1, Q3)      | Mean (STD) | Median (Q1, Q3)    | Mean (STD)   | Median (Q1, Q3)      | Mean (STD)  | Median (Q1, Q3)      |
| Total                                                                                                                                                                                       | 691    | 465(67%) | 226(33%) | 45 ± 16 (2-86)  | 53.5(16.3) | 60.0 (41.3, 66.0) | 126.8(58.6) | 114.0 (85.9, 161.0)  | 68.1(30.6) | 61.1 (46.2, 83.2)  | 187.3(91.9)  | 160.0 (126.3, 219.7) | 100.9(47.4) | 86.0 (71.6, 115.5)   |
| Normal Controls                                                                                                                                                                             | 159    | 83(52%)  | 76(48%)  | 37 ± 16 (11-77) | 63.0(5.3)  | 63.0 (59.7, 66.3) | 77.5(25.6)  | 72.4 (57.6, 94.7)    | 42.8(11.2) | 41.7 (34.3, 50.1)  | 138.2(33.0)  | 133.0 (112.3, 158.6) | 76.3(13.3)  | 74.6 (67.4, 84.6)    |
| 1 HCM                                                                                                                                                                                       | 239    | 160(67%) | 79(33%)  | 49 ± 15 (7-86)  | 65.2(7.1)  | 66.0 (62.0, 70.0) | 150.1(62.5) | 138.8 (102.9, 179.3) | 82.2(32.4) | 75.8 (58.8, 100.5) | 144.9(40.1)  | 141.0 (118.7, 164.5) | 79.5(20.1)  | 78.0 (68.6, 89.1)    |
| 2 DCM                                                                                                                                                                                       | 107    | 74(69%)  | 33(31%)  | 45 ± 15 (2-77)  | 31.3(10.1) | 31.0 (22.9, 40.0) | 129.9(46.5) | 119.9 (96.3, 158.2)  | 69.3(22.5) | 66.8 (53.8, 81.4)  | 300.4(113.2) | 280.0 (216.9, 363.9) | 161.8(62.0) | 148.0 (121.0, 191.8) |
| 3 CAD                                                                                                                                                                                       | 58     | 51(88%)  | 7(12%)   | 53 ± 12 (29-81) | 35.7(13.2) | 33.0 (26.5, 44.5) | 129.9(44.3) | 121.0 (97.5, 155.0)  | 68.0(21.4) | 62.9 (51.5, 81.8)  | 248.7(83.8)  | 231.4 (190.9, 312.1) | 131.0(43.1) | 123.3 (100.5, 162.2) |
| 4 LVNC                                                                                                                                                                                      | 10     | 7(70%)   | 3(30%)   | 35 ± 13 (17-57) | 45.3(12.6) | 47.5 (42.3, 55.5) | 104.7(42.7) | 100.2 (71.8, 123.3)  | 57.4(22.5) | 54.9 (39.8, 66.1)  | 219.8(90.3)  | 181.2 (160.2, 282.0) | 120.7(47.6) | 102.3 (89.4, 144.3)  |
| 5 RCM                                                                                                                                                                                       | 8      | 1(12%)   | 7(88%)   | 45 ± 18 (13-69) | 56.5(10.3) | 56.2 (53.0, 61.4) | 58.4(19.3)  | 57.4 (47.8, 74.7)    | 38.2(12.6) | 38.0 (31.8, 50.0)  | 99.1(38.9)   | 95.4 (75.8, 105.7)   | 64.9(28.6)  | 57.9 (50.7, 70.8)    |
| 6 CAM                                                                                                                                                                                       | 10     | 6(60%)   | 4(40%)   | 62 ± 10 (40-73) | 49.9(11.2) | 49.1 (42.5, 59.5) | 134.1(38.3) | 124.5 (112.8, 171.5) | 88.2(37.1) | 75.5 (66.9, 99.5)  | 118.6(35.4)  | 121.4 (89.7, 145.6)  | 74.6(18.1)  | 82.8 (68.0, 85.3)    |
| 7 HHD                                                                                                                                                                                       | 72     | 64(89%)  | 8(11%)   | 43 ± 13 (16-71) | 44.6(13.7) | 42.5 (33.9, 54.3) | 168.1(60.5) | 158.5 (125.3, 203.2) | 84.4(34.0) | 77.3 (60.0, 100.1) | 236.2(93.5)  | 225.6 (175.5, 263.4) | 117.4(48.5) | 108.6 (86.5, 138.3)  |
| 8 Myocarditis                                                                                                                                                                               | 10     | 7(70%)   | 3(30%)   | 40 ± 19 (14-70) | 54.1(11.7) | 56.5 (46.0, 63.4) | 99.8(31.1)  | 91.0 (86.0, 113.4)   | 54.1(16.7) | 53.3 (39.8, 63.3)  | 160.2(39.0)  | 157.7 (128.3, 186.2) | 84.8(18.7)  | 87.6 (74.4, 98.9)    |
| 9 ARVC                                                                                                                                                                                      | 15     | 10(67%)  | 5(33%)   | 52 ± 13 (27-67) | 42.3(12.4) | 44.7 (35.9, 48.2) | 89.6(29.0)  | 87.2 (64.9, 115.7)   | 49.2(13.4) | 47.6 (37.4, 56.9)  | 204.6(66.0)  | 220.3 (162.3, 232.9) | 113.3(33.5) | 116.6 (88.4, 123.6)  |
| 10 PAH                                                                                                                                                                                      | 0      | -        | -        | -               | -          | -                 | -           | -                    | -          | -                  | -            | -                    | -           | -                    |
| 11 Ebstein's Anomaly                                                                                                                                                                        | 3      | 2(67%)   | 1(33%)   | 33 ± 8 (25-41)  | 61.1(6.6)  | 63.6 (58.6, 64.8) | 72.6(15.9)  | 80.7 (67.4, 81.7)    | 41.7(6.7)  | 43.6 (39.0, 45.4)  | 125.0(19.3)  | 134.7 (118.7, 136.1) | 72.8(13.4)  | 74.3 (66.5, 79.8)    |

\*Q1: the first quartile; Q3: the third quartile; STD: standard deviation; LV: left ventricular mass; LVMi: left ventricular mass index; EDV: end-diastolic volume; EDVi: end-diastolic volume index; LVEF: left ventricular ejection fraction.

## 7. Supplementary Table 7. The typical CMR scan protocol and scanner parameters for the primary and external sets.

| Supplementary Table 7   The typical CMR scan protocol and scanner parameters for the primary and external sets. |                            |               |         |         |         |         |         |         |         |         |       |
|-----------------------------------------------------------------------------------------------------------------|----------------------------|---------------|---------|---------|---------|---------|---------|---------|---------|---------|-------|
|                                                                                                                 | FW                         |               | AZ      |         | GD      | HEB     | LZ      | RJ      | TJ      | XH      |       |
| Manufacture                                                                                                     | SIEMENS                    | GE Healthcare | Philips | Philips | Philips | Philips | Philips | Philips | SIEMENS | SIEMENS |       |
| Magnetic field strength                                                                                         | 3                          | 3             | 3       | 3       | 3       | 3       | 3       | 3       | 3       | 3       |       |
| CINE                                                                                                            | Slice thickness (mm)       | 8             | 8       | 8       | 8       | 8       | 8       | 6       | 8       | 8       |       |
|                                                                                                                 | Slice spacing (mm)         | 10            | 8       | 10      | 8       | 10      | 10      | 8       | 6       | 10      |       |
|                                                                                                                 | Typical field of view (cm) | 35            | 35      | 35      | 27      | 24      | 30      | 35      | 30      | 36      |       |
|                                                                                                                 | Echo time (ms)             | 1.47          | 1.69    | 1.48    | 1.60    | 1.50    | 1.50    | 1.60    | 1.60    | 1.42    | 1.41  |
|                                                                                                                 | Temporal resolution (ms)   | 43.42         | 53.28   | 47.4    | 49.00   | 44.00   | 67.00   | 49.00   | 80.00   | 37.68   | 45.08 |
|                                                                                                                 | Flip angle (degrees)       | 52            | 50      | 45      | 45      | 45      | 45      | 45      | 45      | 46      | 50    |
|                                                                                                                 | Pixel Bandwidth (Hz/pixel) | 990           | 488     | 1701    | 2164    | 1420    | 2188    | 1938    | 1827    | 965     | 960   |
| LGE                                                                                                             | Slice thickness (mm)       | 8             | 8       | 8       | 8       | 8       | 8       | 8       | 10      | 8       | 8     |
|                                                                                                                 | Slice spacing (mm)         | 9.6           | 8       | 9       | 8       | 10      | 10      | 8       | 10      | 10      | 10    |
|                                                                                                                 | Typical field of view (cm) | 38            | 35      | 36      | 27      | 25      | 30      | 35      | 30      | 34      | 35    |
|                                                                                                                 | Echo time (ms)             | 1.96          | 2.78    | 3       | 3.00    | 3.00    | 3.00    | 3.00    | 3.00    | 1.20    | 2.00  |
|                                                                                                                 | Repetition time (ms)       | 6             | 5.98    | 6       | 6.06    | 6.13    | 6.10    | 6.10    | 6.10    | 6       | 6     |
|                                                                                                                 | Inversion Time (ms)        | 300           | 300     | 300     | 300     | 300     | 300     | 350     | 375     | 280     | 360   |
|                                                                                                                 | Flip angle (degrees)       | 20            | 25      | 25      | 25      | 25      | 25      | 25      | 25      | 55      | 20    |
| Pixel Bandwidth (Hz/pixel)                                                                                      | 285                        | 244           | 250     | 226     | 257     | 258     | 253     | 253     | 770     | 285     |       |

FW: Beijing Fuwai Hospital, Beijing; AZ: Beijing Anzhen Hospital, Beijing; GD: Guangdong Provincial People's Hospital, Guangzhou; HEB: The 2nd Affiliated Hospital of Harbin Medical University, Harbin; LZ: The First Hospital of Lanzhou University, Lanzhou; RJ: Renji Hospital, Shanghai; TJ: Tongji hospital, Wuhan; XH: Peking Union Medical College Hospital, Beijing.

## 8. Supplementary Figure 1. The distribution of LVEF across the 11 CVD classes and the normal control class in the primary dataset

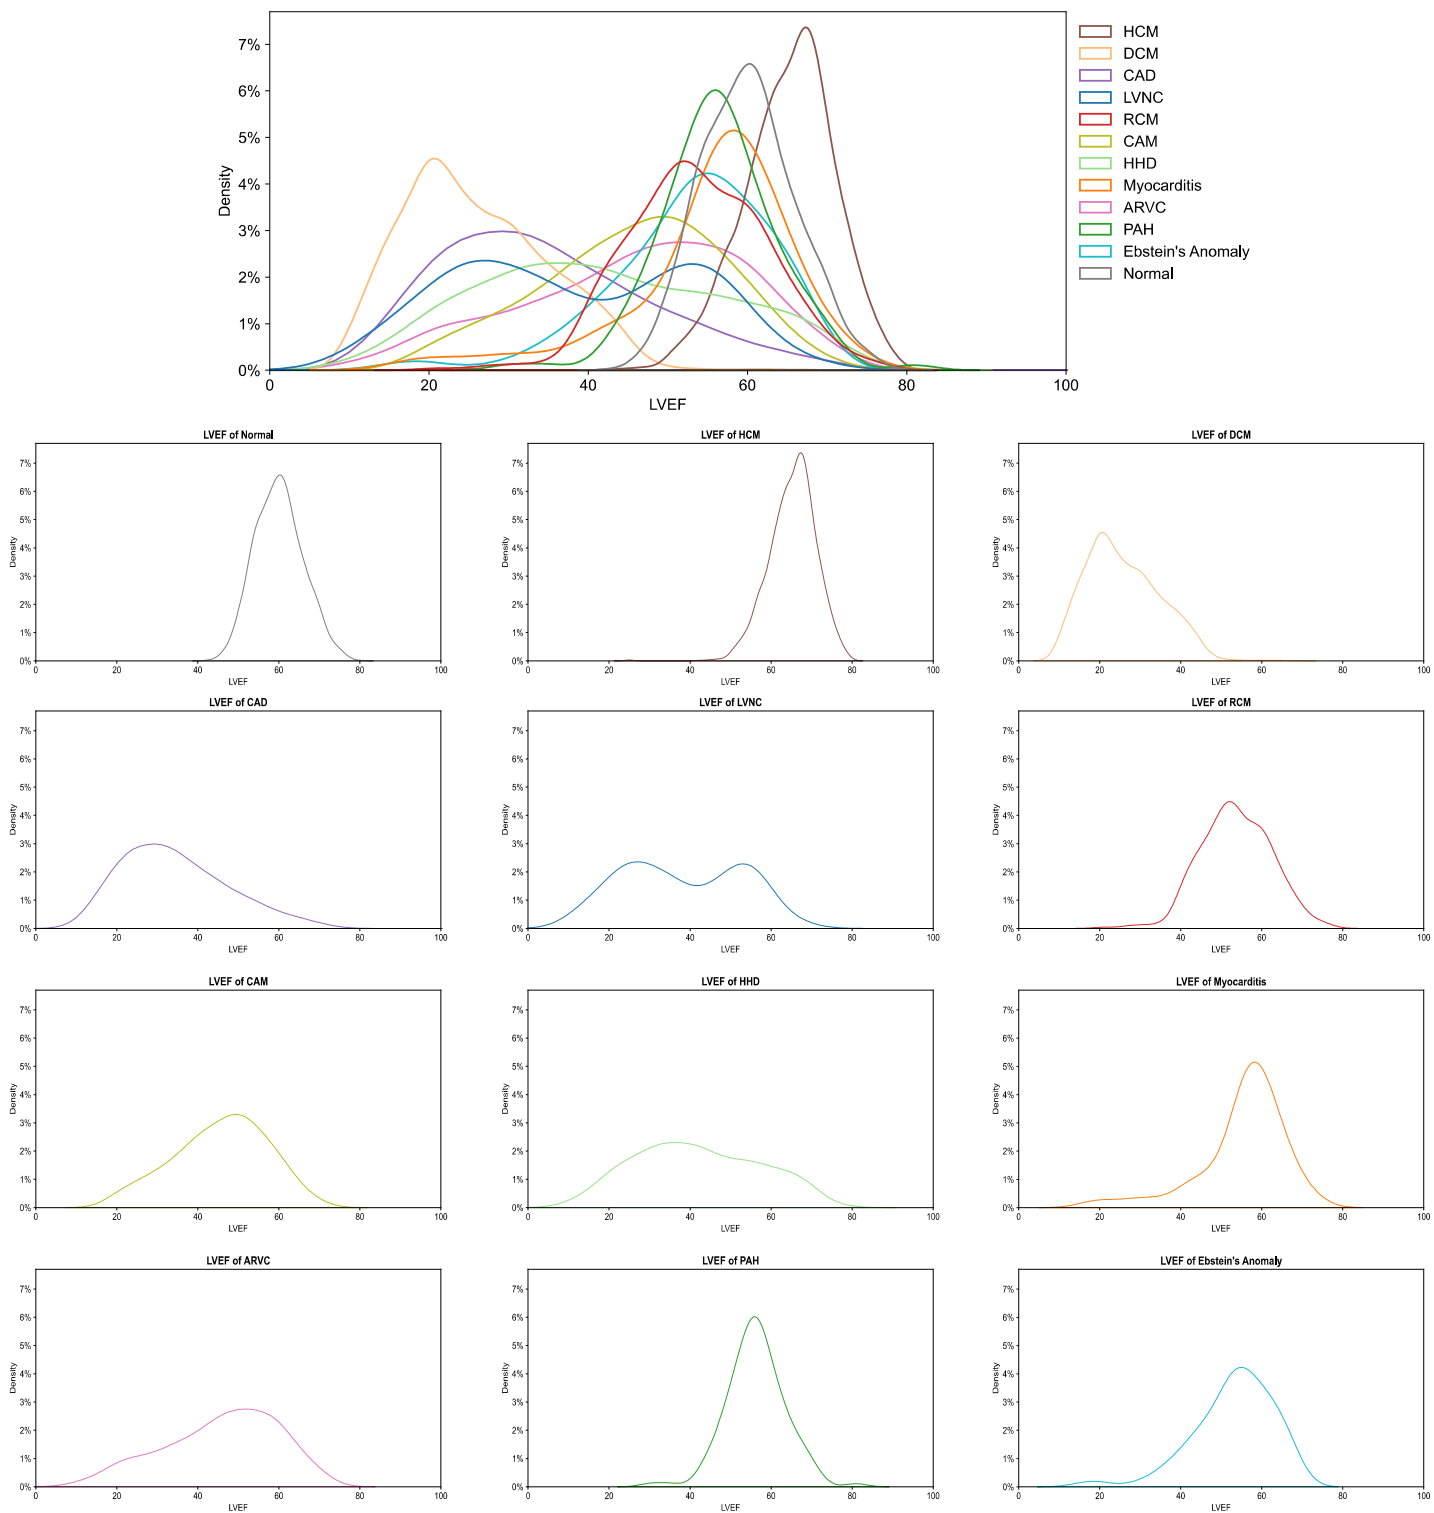

### 9. Supplementary Figure 2. The clinical prevalence of CVD classes

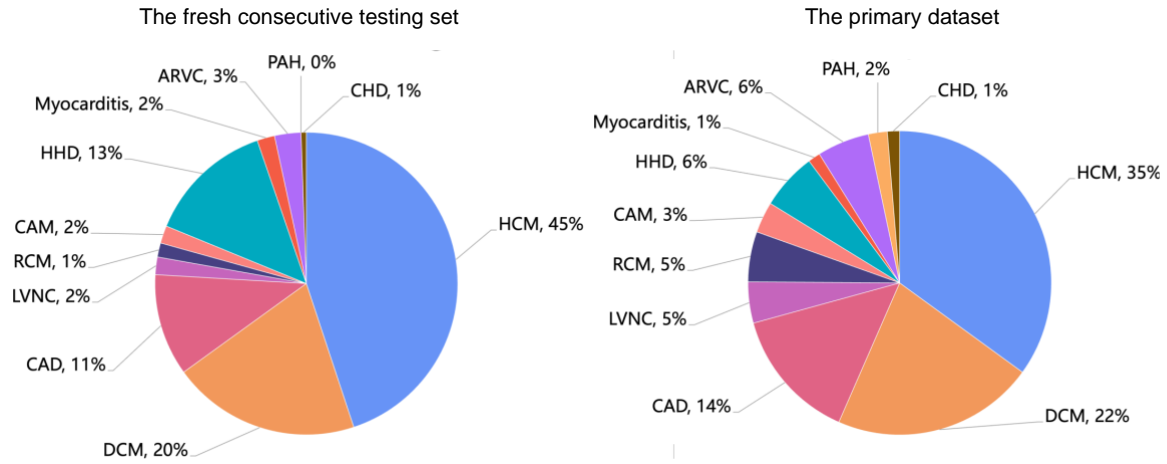

### 10. Supplementary Figure 3. The impact of learning rate modification on the VST backbone

The effect of modifying the initialized learning-rate (testing in one-fold of the primary cohort with the diagnostic model derived from SAX cine)

| Initialized learning rate | AUROC |              |       |       | F1 score |              |       |       |
|---------------------------|-------|--------------|-------|-------|----------|--------------|-------|-------|
|                           | 1e-3  | 1e-4         | 1e-5  | 1e-6  | 1e-3     | 1e-4         | 1e-5  | 1e-6  |
| HCM                       | 0.992 | 0.989        | 0.990 | 0.987 | 0.941    | 0.945        | 0.937 | 0.914 |
| DCM                       | 0.973 | 0.975        | 0.972 | 0.962 | 0.825    | 0.849        | 0.817 | 0.788 |
| CAD                       | 0.959 | 0.962        | 0.949 | 0.901 | 0.747    | 0.757        | 0.728 | 0.589 |
| LVNC                      | 0.961 | 0.942        | 0.971 | 0.939 | 0.640    | 0.690        | 0.660 | 0.494 |
| RCM                       | 0.955 | 0.977        | 0.977 | 0.941 | 0.701    | 0.767        | 0.723 | 0.492 |
| CAM                       | 0.975 | 0.970        | 0.988 | 0.975 | 0.771    | 0.823        | 0.750 | 0.633 |
| HHD                       | 0.942 | 0.913        | 0.931 | 0.906 | 0.632    | 0.595        | 0.631 | 0.489 |
| Myocarditis               | 0.936 | 0.967        | 0.980 | 0.943 | 0.367    | 0.490        | 0.510 | 0.432 |
| ARVC                      | 0.966 | 0.986        | 0.974 | 0.942 | 0.692    | 0.778        | 0.733 | 0.597 |
| PAH                       | 0.986 | 0.994        | 0.999 | 0.996 | 0.932    | 0.944        | 0.956 | 0.850 |
| Ebstein's Anomaly         | 0.990 | 0.986        | 0.960 | 0.969 | 0.698    | 0.742        | 0.814 | 0.657 |
| Class frequency-weighted  | 0.974 | <b>0.974</b> | 0.974 | 0.956 | 0.813    | <b>0.834</b> | 0.815 | 0.736 |

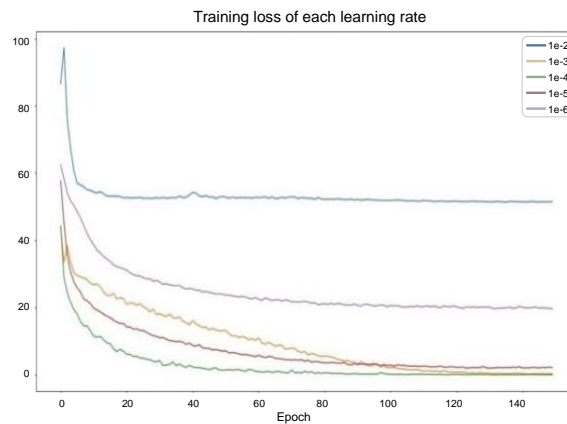

Supplement: 41591_2024_2971_MOESM1_ESM.pdf [file 41591_2024_2971_MOESM1_ESM.pdf]
